# Supplementary material for: Spatio‐temporal assessment of illicit drug use at large scale: evidence from 7 years of international wastewater monitoring
Source: PubMed Central journal article supplement (PMC6973045; doi:10.1111/add.14767), 2019-10-23
Supplement: ADD-115-109-s001.pdf [file ADD-115-109-s001.pdf]

# Appendix 1

## Spatio-temporal assessment of illicit drug use at large scale: evidence from seven years of international wastewater monitoring

Authors:

Iria González-Mariño<sup>1,2,\*</sup>, Jose Antonio Baz-Lomba<sup>3</sup>

Nikiforos A. Alygizakis<sup>4</sup>, Maria Jesús Andrés-Costa<sup>5</sup>, Richard Bade<sup>6</sup>, Leon P. Barron<sup>7</sup>, Frederic Been<sup>8</sup>, Jean-Daniel Berset<sup>9</sup>, Lubertus Bijlsma<sup>10</sup>, Igor Bodík<sup>11</sup>, Asher Brenner<sup>12</sup>, Andreas L. Brock<sup>13</sup>, Daniel A. Burgard<sup>14</sup>, Erika Castrignanò<sup>15,16</sup>, Christophoros E. Christophoridis<sup>17</sup>, Adrian Covaci<sup>18</sup>, Pim de Voogt<sup>19</sup>, Damien A. Devault<sup>20</sup>, Mário J. Dias<sup>21</sup>, Erik Emke<sup>8</sup>, Despo Fatta-Kassinos<sup>22</sup>, Ganna Fedorova<sup>23</sup>, Konstantinos Fytianos<sup>17</sup>, Cobus Gerber<sup>6</sup>, Roman Grabic<sup>23</sup>, Stefan Grüner<sup>24</sup>, Teemu Gunnar<sup>25</sup>, Evroula Hapeshi<sup>22</sup>, Ester Heath<sup>26</sup>, Björn Helm<sup>24</sup>, Félix Hernández<sup>10</sup>, Aino Kankaanpää<sup>25</sup>, Sara Karolak<sup>20</sup>, Barbara Kasprzyk-Hordern<sup>15</sup>, Ivona Krizman-Matasic<sup>27</sup>, Foon Yin Lai<sup>28</sup>, Wojciech Lechowicz<sup>29</sup>, Alvaro Lopes<sup>30</sup>, Miren López de Alda<sup>31</sup>, Ester López-García<sup>31</sup>, Arndís S.C. Löve<sup>32</sup>, Nicola Mastroianni<sup>31</sup>, Gillian L. McEneff<sup>7</sup>, Rosa Montes<sup>1</sup>, Kelly Munro<sup>7</sup>, Thomas Nefau<sup>20</sup>, Herbert Oberacher<sup>33</sup>, Jake W. O'Brien<sup>34</sup>, Kristin Olafsdottir<sup>32</sup>, Yolanda Picó<sup>5</sup>, Benedek G. Plósz<sup>13,35</sup>, Fabio Polesel<sup>13</sup>, Cristina Postigo<sup>31</sup>, José Benito Quintana<sup>1</sup>, Pedram Ramin<sup>13,36</sup>, Malcolm J. Reid<sup>3</sup>, Jack Rice<sup>15</sup>, Rosario Rodil<sup>1</sup>, Ivan Senta<sup>27</sup>, Susana M. Simões<sup>21</sup>, Maja M. Sremacki<sup>37</sup>, Katarzyna Styszko<sup>38</sup>, Senka Terzic<sup>27</sup>, Nikolaos S. Thomaidis<sup>4</sup>, Kevin V. Thomas<sup>3,34</sup>, Ben J. Tschärke<sup>34</sup>, Alexander L.N. van Nuijs<sup>18</sup>, Viviane Yargeau<sup>39</sup>, Ettore Zuccato<sup>40</sup>, Sara Castiglioni<sup>40,\*</sup>, Christoph Ort<sup>41</sup>.

\*Corresponding authors:

Iria González-Mariño: Tel: +34 881 816 035; e-mail: [iria.gonzalez@usc.es](mailto:iria.gonzalez@usc.es), [iriagonzalez@usal.es](mailto:iriagonzalez@usal.es)

Sara Castiglioni: Tel: +39 02 39014776; e-mail: [sara.castiglioni@marionegri.it](mailto:sara.castiglioni@marionegri.it)

1. Institute for Food Analysis and Research, Department of Analytical Chemistry, Universidade de Santiago de Compostela, 15782 Santiago de Compostela, Spain
2. Faculty of Chemical Sciences, Department of Analytical Chemistry, Nutrition and Bromatology, University of Salamanca, 37008 Salamanca, Spain
3. Norwegian Institute for Water Research (NIVA), Gaustadalléen 21, NO-0349 Oslo, Norway
4. National and Kapodistrian University of Athens, Department of Chemistry, Laboratory of Analytical Chemistry, 15771 Athens, Greece
5. Food and Environmental Safety Research Group (SAMA-UV) - CIDE (CSIC-UV-GV), University of Valencia, Moncada-Naquera Road Km 4,3, 46113 Moncada, Spain
6. School of Pharmacy and Medical Sciences, University of South Australia, GPO Box 2471, Adelaide, South Australia 5001, Australia
7. King's Forensics, School of Population Health & Environmental Sciences, King's College London, London SE1 9NH, United Kingdom
8. KWR Watercycle Research Institute, P.O. Box 1072, 3430 BB, Nieuwegein, The Netherlands
9. University of Bern, Institute of Plant Sciences, Altenbergrain 21, 3013 Bern, Switzerland
10. Research Institute for Pesticides and Water, University Jaume I, Avda. Sos Baynat s/n, E-12071 Castellón, Spain
11. Department of Environmental Engineering, Faculty of Chemical and Food Technology, Slovak University of Technology, Radlinského 2101/9, 812 37 Bratislava, Slovakia
12. Unit of Environmental Engineering, Ben-Gurion University of the Negev, Beer-Sheva, 8410501, Israel
13. Department of Environmental Engineering, Technical University of Denmark, Bygningstorvet, Building 115, 2800 Kgs. Lyngby, Denmark
14. University of Puget Sound, 1500 N. Warner St., Tacoma, WA 98416, United States
15. Department of Chemistry, University of Bath, Bath BA2 7AY, United Kingdom
16. Department of Analytical, Environmental & Forensic Sciences, King's College London, London SE1 9NH, United Kingdom
17. Environmental Pollution Control Laboratory, Chemistry Department, Aristotle University of Thessaloniki, 54124 Thessaloniki, Greece
18. Toxicological Center, Department of Pharmaceutical Sciences, Campus Drie Eiken, University of Antwerp, Universiteitsplein 1, 2610 Antwerp, Belgium
19. IBED, University of Amsterdam, Science Park 904, 1098 XH Amsterdam, The Netherlands
20. Université Paris-Sud, CNRS, AgroParisTech, Université Paris-Saclay, 5 rue Jean Baptiste Clément, Chatenay-Malabry, 92296, France
21. National Institute of Legal Medicine and Forensic Sciences, Rua Manuel Bento de Sousa 3, Lisbon, Portugal
22. NIREAS-International Water Research Center, Department of Civil and Environmental Engineering, University of Cyprus, P.O. Box 20537, 1678, Nicosia, Cyprus
23. University of South Bohemia in Ceske Budejovice, Faculty of Fisheries and Protection of Waters, South Bohemian Research Center of Aquaculture and Biodiversity of Hydrocenoses, Zatisi 728/II, Czech Republic

24. Technische Universität Dresden, Chair of Urban Water Management, 01069 Dresden, Germany
25. Forensic Toxicology, National Institute for Health and Welfare (THL), Mannerheimintie 166, Helsinki, Finland
26. Department of Environmental Sciences, Jožef Stefan Institute, Jamova cesta 39, Ljubljana, Slovenia
27. Rudjer Boskovic Institute, Division for Marine and Environmental Research, Bijenicka 54, Zagreb, Croatia
28. Department of Aquatic Sciences and Assessment, Swedish University of Agricultural Sciences (SLU), Box 7050, SE-750 07 Uppsala, Sweden
29. Institute of Forensic Research, Westerplatte 9, 31-033 Krakow, Poland
30. University of Lisbon, Faculty of Pharmacy, Av. Professor Gama Pinto, 1649-003 Lisbon, Portugal
31. Water and Soil Quality Research Group, Department of Environmental Chemistry, Institute of Environmental Assessment and Water Research (IDAEA-CSIC), Jordi Girona, 18-26, 08034 Barcelona, Spain
32. Department of Pharmacology and Toxicology, University of Iceland, Hofsvallagata 53, Reykjavík, Iceland
33. Institute of Legal Medicine and Core Facility Metabolomics, Medical University of Innsbruck, Innrain 52, 6020 Innsbruck, Austria
34. Queensland Alliance for Environmental Health Sciences (QAEHS), The University of Queensland, 20 Cornwall Street, Woolloongabba, Queensland, 4102, Australia
35. University of Bath, Department of Chemical Engineering, Claverton Down, Bath BA2 7AY, UK
36. Process and Systems Engineering Center (PROSYS), Department of Chemical and Biochemical Engineering, Technical University of Denmark, Building 229, 2800 Kgs. Lyngby, Denmark
37. University of Novi Sad, Faculty of Technical Sciences, Department of Environmental Engineering and Occupational Safety, Trg Dositeja Obradovica 6, Novi Sad 106314, Serbia
38. AGH University of Science and Technology, Department of Coal Chemistry and Environmental Sciences, Al. Mickiewicza 30, Krakow, Poland
39. Department of Chemical Engineering, McGill University, 3610 University, Montreal, Quebec, H3A 0C5, Canada
40. Istituto di Ricerche Farmacologiche Mario Negri IRCCS, Via Giuseppe La Masa, 19, 20156 Milan, Italy
41. Swiss Federal Institute of Aquatic Science and Technology, Eawag, Urban Water Management, Überlandstrasse 133, 8600 Dübendorf, Switzerland

**Table S1.** Population served by each wastewater treatment plant (WWTP). Countries are defined by a two-letter abbreviation following the ISO 3166-1 alpha-2 code.

| City           | country | Population of the city under investigation ① | Estimated population in WWTP catchment |         |         |         |         |         | Coverage during last year participation (%) ② |      |
|----------------|---------|----------------------------------------------|----------------------------------------|---------|---------|---------|---------|---------|-----------------------------------------------|------|
|                |         |                                              | 2011                                   | 2012    | 2013    | 2014    | 2015    | 2016    | 2017                                          |      |
| Innsbruck      | AT      | 130 894 (W 2016)                             |                                        |         |         |         |         | 262 780 | 261 503                                       | 200  |
| Klosterneuburg | AT      | 26 750 (W 2016)                              |                                        |         |         |         | 30 000  |         |                                               | 112  |
| Adelaide (4)   | AU      | 1 333 927 (W 2017)                           |                                        |         |         |         |         |         | 1 133 475                                     | 85   |
| Adelaide BA    | AU      | "                                            |                                        |         |         |         |         |         | 689 802                                       |      |
| Adelaide BH    | AU      | "                                            |                                        |         |         |         |         |         | 91 394                                        |      |
| Adelaide G     | AU      | "                                            |                                        |         |         |         |         |         | 207 154                                       |      |
| Adelaide CB    | AU      | "                                            |                                        |         |         |         |         |         | 145 125                                       |      |
| Canberra       | AU      | 410 301 (W 2017)                             |                                        |         |         | 338 888 | 338 888 |         | 390 706                                       | 95   |
| Toowoomba      | AU      | 135 631 (W 2017)                             |                                        |         |         | 125 000 | 125 000 |         | 125 000                                       | 92   |
| Sarajevo       | BA      | C: 395 133 M: 688 437 (W)                    |                                        |         | 130 000 |         |         | 150 000 |                                               | 38 C |
| Antwerp (2)    | BE      | 520 504 (W 2017)                             |                                        | 344 094 | 344 094 | 344 094 | 344 094 | 344 094 |                                               | 66   |
| Antwerp D      | BE      | "                                            |                                        | 213 876 | 213 876 | 213 876 | 213 876 | 213 876 |                                               |      |
| Antwerp Z      | BE      | "                                            | 117 200                                | 130 218 | 130 218 | 130 218 | 130 218 | 130 218 | 130 218                                       |      |
| Boom           | BE      | 17 970 (W 2018)                              |                                        |         |         |         |         |         | 30 600                                        | 170  |
| Brussels       | BE      | 1 196 831 (E 2015)                           | 1 027 300                              | 953 987 | 953 987 |         | 953 987 | 953 987 | 953 987                                       | 80   |
| Geraardsbergen | BE      | 33 403 (W 2018)                              |                                        |         | 29 047  | 29 047  | 29 047  |         |                                               | 87   |
| Koksijde       | BE      | 21 957 (W 2018)                              |                                        |         | 78 441  |         | 78 441  | 78 441  | 78 441                                        | 357  |
| Merchtem       | BE      | 16 294 (W 2018)                              |                                        |         |         |         |         |         | 16 200                                        | 99   |
| Ninove         | BE      | 37 289 (W 2012)                              |                                        |         | 36 179  | 36 179  | 36 179  |         |                                               | 97   |

|               |    |                                           |         |           |           |           |         |      |
|---------------|----|-------------------------------------------|---------|-----------|-----------|-----------|---------|------|
| Oostende      | BE | 70 813 (E 2015)                           |         |           | 159 000   | 159 000   | 159 000 | 225  |
| Ruisbroek     | BE | 34 038 (W 2018)                           |         |           |           |           | 36 000  | 106  |
| Sofia         | BG | 1 549 659 (E 2017 )                       |         |           |           | 1 200 000 |         | 77   |
| Granby        | CA | 63 433 (W 2011)                           |         | 55 255    | 55 255    |           |         | 87   |
| Montreal      | CA | 1 704 694 (W 2016)                        |         | 1 958 257 | 1 958 257 |           |         | 115  |
| Basel         | CH | C: 175 940 M: 319 220<br>(W 2017, E 2014) | 260 000 | 260 000   | 260 000   | 260 000   | 260 000 | 81 M |
| Berne         | CH | C: 142 656 M: 406 900<br>(W 2018)         | 206 655 | 206 655   | 206 655   | 206 655   | 206 655 | 51 M |
| Biel          | CH | 53 031 (E 2014)                           |         |           | 82 285    |           |         | 155  |
| Chur          | CH | 34 880 (W 2008)                           |         |           | 52 800    | 52 800    |         | 151  |
| Geneva        | CH | 198 979 (W 2016)                          | 410 486 | 410 486   | 417 200   | 417 200   | 417 200 | 210  |
| Lausanne      | CH | 229 425 (E 2014)                          |         |           | 220 000   | 220 000   |         | 96   |
| Lugano        | CH | 83 727 (E 2014)                           |         |           | 103 561   | 103 561   | 103 561 | 124  |
| Luzern        | CH | 159189 (E 2014)                           |         |           | 174 800   | 174 800   |         | 110  |
| Neuchatel     | CH | 33 772 (W 2016)                           |         |           | 50 000    | 50 000    |         | 148  |
| Sion          | CH | 33 999 (W 2016)                           |         |           | 45 000    | 45 000    |         | 132  |
| St.Gallen (2) | CH | 75 481 (W 2016)                           | 89 000  | 89 000    |           |           |         | 118  |
| St.Gallen H   | CH | "                                         | 52 000  | 52 000    | 52 000    | 52 000    | 52 000  |      |
| St.Gallen A   | CH | "                                         | 37 000  | 37 000    |           |           |         |      |
| Winterthur    | CH | 105 676 (E2014)                           |         |           | 125 000   | 125 000   |         | 118  |
| Zurich        | CH | 402 762 (W 2016)                          | 410 000 | 410 000   | 410 000   | 410 000   | 410 000 | 102  |
| Bogota        | CO | 8 080 734 (W 2017)                        |         |           |           | 2 500 000 |         | 31   |
| Medellin      | CO | 2 441 123 (W 2013)                        |         |           |           | 600 000   |         | 25   |
| Nicosia       | CY | 234 200 (E 2009)                          |         | 28 000    | 28 000    | 28 000    | 28 000  | 12   |
| Limassol      | CY | 185 100 (E 2009)                          |         | 272 000   | 120 000   | 120 000   | 120 000 | 65   |
| Brno          | CZ | 377 028 (E 2015)                          |         |           |           |           | 445 000 | 118  |

|               |    |                    |         |           |           |           |           |           |           |     |
|---------------|----|--------------------|---------|-----------|-----------|-----------|-----------|-----------|-----------|-----|
| Budweis       | CZ | 93 285 (W 2015)    | 112 000 | 112 000   | 110 300   |           | 110 300   | 110 300   | 110 300   | 118 |
| Prague        | CZ | 1 297 000 (W 2018) |         | 1 300 000 | 1 300 000 |           |           |           |           | 100 |
| Chemnitz      | DE | 246 855 (W 2017)   |         |           |           |           |           |           | 239 402   | 97  |
| Berlin (4)    | DE | 3 469 849 (E 2015) |         |           | 3 840 000 | 3 840 000 |           |           | 3 993 500 | 115 |
| Berlin M      | DE | "                  |         |           | 290 000   | 290 000   |           |           | 333 500   |     |
| Berlin R      | DE | "                  |         |           | 1 300 000 | 1 300 000 |           |           | 1 560 000 |     |
| Berlin S      | DE | "                  |         |           | 750 000   | 750 000   |           |           | 750 000   |     |
| Berlin W      | DE | "                  |         |           | 1 500 000 | 1 500 000 |           |           | 1 350 000 |     |
| Dortmund      | DE | 580 511 (E 2015)   |         | 371 788   | 371 788   | 371 788   | 371 788   | 371 788   | 371 788   | 64  |
| Dülmen        | DE | 46 523 (W 2016)    |         | 34 495    | 34 495    | 34 495    | 34 046    | 44 428    |           | 95  |
| Dresden       | DE | 536 308 (E 2015)   |         | 593 050   | 593 050   | 593 050   | 669 675   | 669 675   |           | 125 |
| Erfurt        | DE | 212 988 (W 2017)   |         |           |           |           |           |           | 213 977   | 100 |
| Munich (2)    | DE | 1 429 584 (E 2015) |         |           |           |           | 1 739 040 | 1 826 704 |           | 128 |
| Munich G      | DE | "                  |         |           | 1 000 000 | 1 000 000 | 1 043 424 | 1 181 985 |           |     |
| Munich M      | DE | "                  |         |           |           |           | 695 616   | 644 719   |           |     |
| Nuremberg     | DE | 515 201 (W 2017)   |         |           |           |           |           | 453 914   |           | 88  |
| Hamburg (2)   | DE | 1 762 791 (E 2015) |         |           |           |           |           | 2 050 000 |           | 116 |
| Hamburg N     | DE | "                  |         |           |           |           |           | 630 000   |           |     |
| Hamburg S     | DE | "                  |         |           |           |           |           | 1 420 000 |           |     |
| Hannover (2)  | DE | 535 061 (W 2017)   |         |           |           |           |           | 740 000   |           | 138 |
| Hannover H    | DE | "                  |         |           |           |           |           | 325 000   |           |     |
| Hannover G    | DE | "                  |         |           |           |           |           | 415 000   |           |     |
| Frankfurt (3) | DE | 717 624 (E 2015)   |         |           |           |           |           | 1 118 389 |           | 156 |
| Frankfurt N   | DE | "                  |         |           |           |           |           | 357 230   |           |     |
| Frankfurt G   | DE | "                  |         |           |           |           |           | 520 485   |           |     |
| Frankfurt S   | DE | "                  |         |           |           |           |           | 240 674   |           |     |

|                  |    |                                    |           |           |           |           |           |           |           |         |      |
|------------------|----|------------------------------------|-----------|-----------|-----------|-----------|-----------|-----------|-----------|---------|------|
| Magdeburg        | DE | 232 306 (E 2015)                   |           |           |           |           |           |           |           | 278 236 | 120  |
| Mainz            | DE | 215 110 (W 2017)                   |           |           |           |           |           |           |           | 200 344 | 93   |
| Rostock          | DE | 208 409 (W 2017)                   |           |           |           |           |           |           |           | 237 316 | 114  |
| Saarbrücken (2)  | DE | 180 966 (W 2017)                   |           |           |           |           |           |           |           | 203 164 | 112  |
| Saarbrücken Br   | DE | "                                  |           |           |           |           |           |           |           | 81 399  |      |
| Saarbrücken Bu   | DE | "                                  |           |           |           |           |           |           |           | 121 765 |      |
| Stuttgart        | DE | 632 743 (W 2017)                   |           |           |           |           |           |           |           | 602 000 | 95   |
| Copenhagen       | DK | 763 908 (W 2018)                   |           |           | 531 000   | 531 000   | 531 000   |           |           |         | 70   |
| Barcelona        | ES | C: 1 621 090 M: 3 624 554 (E 2016) | 1 162 000 | 1 162 000 | 1 162 000 | 1 150 874 | 1 150 874 | 1 149 722 | 1 154 819 |         | 71 C |
| Castellon        | ES | 170 990 (W 2016)                   | 170 600   | 204 878   | 204 878   | 180 690   | 180 690   | 171 669   | 171 669   |         | 100  |
| Molina de Segura | ES | 69 614 (W 2016)                    |           |           |           |           | 70 709    | 70 709    |           |         | 102  |
| Santiago         | ES | 95 966 (E 2016)                    | 136 500   | 136 500   | 136 500   | 136 500   | 136 500   | 136 500   | 136 500   |         | 142  |
| Valencia (3)     | ES | C: 809 267 M: 1 388 368 (E 2016)   |           |           | 1 357 952 | 1 357 952 | 1 310 859 | 1 310 859 | 1 191 210 |         | 86 M |
| Valencia P1      | ES | "                                  |           |           | 322 926   | 322 926   | 322 926   | 322 926   | 388 657   |         |      |
| Valencia P2      | ES | "                                  |           |           | 820 026   | 820 026   | 820 026   | 820 026   | 652 495   |         |      |
| Valencia QB      | ES | "                                  |           |           | 215 000   | 215 000   | 167 907   | 167 907   | 150 058   |         |      |
| Espoo            | FI | 269 802 (E 2015)                   |           |           |           | 300 000   | 300 000   | 300 000   | 300 000   |         | 111  |
| Helsinki         | FI | 1 122 101 (E 2015)                 | 780 000   | 780 000   | 780 000   | 800 000   | 800 000   | 800 000   | 800 000   |         | 71   |
| Joensuu          | FI | 75 652 (W 2017)                    |           |           |           | 75 000    |           | 81 849    |           |         | 108  |
| Jyväskylä        | FI | 137 368 (E 2015)                   |           |           |           | 135 000   |           | 135 000   |           |         | 98   |
| Kotka            | FI | 53 730 (W 2017)                    |           |           |           | 72 500    |           | 72 500    |           |         | 135  |
| Kuopio           | FI | 116 921 (E 2015)                   |           |           |           | 80 000    |           | 85 588    |           |         | 73   |
| Lahti            | FI | 118 743 (E 2015)                   |           |           |           | 63 000    |           | 63 000    |           |         | 53   |
| Lappeenranta     | FI | 72 685 (W 2017)                    |           |           |           | 60 000    |           | 60 000    |           |         | 83   |
| Oulu             | FI | 198 525 (E 2015)                   |           |           |           | 195 000   |           | 174 500   |           |         | 88   |

|                  |    |                                                |           |           |           |           |           |           |           |       |
|------------------|----|------------------------------------------------|-----------|-----------|-----------|-----------|-----------|-----------|-----------|-------|
| Rovaniemi        | FI | 62 037 (W 2017)                                |           |           |           | 49 000    |           | 49 000    |           | 79    |
| Savonlinna       | FI | 34 829 (W 2017)                                |           |           |           | 28 000    |           | 28 000    |           | 80    |
| Tampere          | FI | 225 118 (E 2015)                               |           |           |           | 200 000   | 200 000   | 200 000   | 200 000   | 89    |
| Turku            | FI | 185 908 (E 2015)                               | 275 000   | 275 000   | 275 000   | 285 000   | 285 000   | 285 000   | 300 000   | 161   |
| Vaasa            | FI | 66 876 (W 2017)                                |           |           |           | 67 000    |           | 69 252    |           | 104   |
| Bordeaux (2)     | FR | 753 601 (E 2014)                               |           |           |           |           |           |           | 481 638   | 64    |
| Bordeaux 1       | FR | "                                              |           |           |           |           |           | 254 338   | 254 338   |       |
| Bordeaux 2       | FR | "                                              |           |           |           |           |           |           | 227 300   |       |
| Fort-de-France D | FR | 160 498 (E 2014)                               |           |           |           | 16 500    |           |           |           | 10    |
| Fort-de-France P | FR | "                                              |           |           |           | 19 000    | 19 000    |           | 19 000    |       |
| Paris G          | FR | C: 2 206 488 (W 2018)<br>M: 6 754 282 (E 2014) |           | 245 500   |           |           |           |           |           | 11 C  |
| Paris SC         | FR | "                                              | 774 600   |           | 1 004 000 | 1 004 000 | 1 004 000 | 1 004 000 | 461 866   | 21    |
| Paris SE         | FR | "                                              |           |           |           |           |           |           | 85 263    | 4     |
| Bristol          | GB | 459 300 (W 2017)                               |           |           |           | 886 650   | 886 650   | 886 650   | 886 650   | 193   |
| London           | GB | 8 730 803 (E 2017)                             | 3 400 000 |           | 3 400 000 | 3 400 000 | 3 400 000 | 3 400 000 |           | 39    |
| Athens           | GR | 3 090 508 (W 2011)                             |           |           | 3 700 000 | 3 700 000 | 3 700 000 | 3 700 000 | 3 700 000 | 120   |
| Mytilene         | GR | 37 890 (W 2011)                                |           |           |           |           | 26 000    |           |           | 69    |
| Thessaloniki     | GR | C: 325 182 M: 788 952<br>(W 2011)              |           |           |           | 850 000   | 850 000   |           |           | 108 M |
| Zagreb           | HR | 801 349 (E )                                   | 650 000   | 650 000   | 650 000   | 650 000   | 650 000   | 650 000   | 650 000   | 81    |
| Reykjavik (2)    | IS | 127 220 (W 2018)                               |           |           |           |           |           | 186 000   | 184 292   | 145   |
| Reykjavik N      | IS | "                                              |           |           |           |           | 93 000    | 93 000    | 97 168    |       |
| Reykjavik S      | IS | "                                              |           |           |           |           |           | 93 000    | 87 124    |       |
| Tel-Aviv         | IL | 443 939 (W 2017)                               |           |           |           |           |           | 89 358    |           | 20    |
| Milan            | IT | 2 640 159 (E 2018)                             | 1 250 000 | 1 100 000 | 1 149 477 | 1 122 501 | 1 122 501 | 1 140 000 | 1 080 000 | 41    |
| Bari             | IT | 323 370 (W 2018)                               |           |           |           |           |           |           | 459 650   | 142   |



|              |    |                    |         |         |         |         |           |         |         |     |
|--------------|----|--------------------|---------|---------|---------|---------|-----------|---------|---------|-----|
| Bologna      | IT | 389 261 (W 2018)   |         |         |         |         |           |         | 500 000 | 128 |
| Gorizia      | IT | 34 411 (W 2018)    |         |         |         |         |           |         | 34 844  | 101 |
| Potenza      | IT | 67 211 (W 2018)    |         |         |         |         |           |         | 90 000  | 134 |
| Palermo      | IT | 668 405 (W 2018)   |         |         |         |         |           |         | 360 000 | 54  |
| Busan        | KR | 3 506 103 (W 2018) |         |         |         |         | 1 164 950 |         |         | 33  |
| Bendern      | LI | 37 800 (W 2017)    |         |         |         | 37 000  | 37 000    |         |         | 98  |
| Vilnius      | LT | 536 631 (W 2018)   |         |         |         |         |           |         | 545 280 | 102 |
| Malta        | MT | 475 700 (W 2018)   |         |         |         |         | 296 297   |         |         | 62  |
| Amsterdam    | NL | 810 938 (E 2014)   | 694 800 | 769 000 | 769 000 | 769 000 | 769 000   |         | 769 000 | 95  |
| Eindhoven    | NL | 220 920 (E 2014)   | 448 700 | 450 300 | 450 300 | 450 300 | 450 300   | 450 300 | 450 300 | 204 |
| Utrecht      | NL | 328 164 (E 2014)   | 297 000 | 300 000 | 300 000 | 300 000 | 300 000   | 300 000 | 300 000 | 91  |
| Nieuwegein   |    |                    |         |         |         |         |           |         |         |     |
| Ijssel.      | NL | 62 235 (W 2017)    |         |         |         |         |           |         | 96 000  | 154 |
| Oudewater    | NL | 10 108 (W 2017)    |         |         |         |         |           |         | 10 110  | 100 |
| Auckland (2) | NZ | 1 534 700 (W 2017) |         |         |         |         | 1 332 000 |         |         | 87  |
| Auckland M   | NZ | "                  |         |         |         |         | 1 100 000 |         |         |     |
| Auckland R   | NZ | "                  |         |         |         |         | 232 000   |         |         |     |
| Oslo         | NO | 673 469 (W 2018)   | 557 000 | 557 000 | 576 000 | 580 639 | 580 639   | 580 639 | 580 639 | 86  |
| Krakow (2)   | PL | 766 739 (W 2017)   |         |         |         |         |           | 930 000 | 930 000 | 121 |
| Krakow K     | PL | "                  |         |         |         |         |           | 250 000 | 250 000 |     |
| Krakow P     | PL | "                  |         |         |         |         |           | 680 000 | 680 000 |     |
| Almada       | PT | 174 030 (W 2011)   |         |         |         | 138 685 | 138 685   | 138 685 | 138 685 | 80  |
| Lisbon       | PT | 505 526 (W 2017)   |         |         | 426 964 |         | 426 964   | 426 964 | 426 964 | 84  |
| Porto        | PT | 287 591 (W)        |         |         |         |         | 150 000   | 150 000 | 150 000 | 52  |
| Alba Iulia   | RO | 74 283 (E 2015)    |         |         |         |         |           | 63 000  |         | 85  |
| Cluj Napoca  | RO | 321 916 (E 2015)   |         |         | 350 000 |         |           | 360 000 |         | 112 |
| Beograd      | RS | 1 166 763 (W 2011) |         |         | 284 347 |         |           | 500 000 |         | 43  |

|                |    |                    |         |         |         |         |         |         |  |     |
|----------------|----|--------------------|---------|---------|---------|---------|---------|---------|--|-----|
| Novi Sad       | RS | 277 522 (W 2011)   |         |         | 321 282 |         |         |         |  | 116 |
| Gothenburg     | SE | 520 374 (E 2011)   |         | 664 441 | 664 441 |         |         |         |  | 128 |
| Stockholm (2)  | SE | 1 579 896 (E 2011) |         |         |         |         | 784 000 |         |  | 50  |
| Stockholm H    | SE | "                  | 315 000 |         |         |         | 326 000 |         |  |     |
| Stockholm S    | SE | "                  |         |         |         |         | 458 000 |         |  |     |
| Umeå           | SE | 116 465 (E 2011)   | 115 800 | 115 800 | 115 800 |         |         |         |  | 99  |
| Ljubljana      | SI | 288 307 (E )       |         |         |         |         |         | 266 131 |  | 92  |
| Bratislava (2) | SK | 422 932 (E )       |         |         | 440 000 | 470 000 | 470 000 | 600 000 |  | 142 |
| Bratislava C   | SK | "                  |         |         | 320 000 | 350 000 | 350 000 | 450 000 |  |     |
| Bratislava P   | SK | "                  |         |         | 120 000 | 120 000 | 120 000 | 150 000 |  |     |
| Piestany       | SK | 27 777 (W 2016)    |         |         | 30 000  | 30 000  | 30 000  | 30 000  |  | 108 |
| Uzhhorod       | UA | 115 163 (W 2016)   |         |         |         |         | 116 200 |         |  | 101 |
| Seattle        | US | 608 660 (W 2010)   |         |         |         | 893 000 | 893 000 | 893 000 |  | 147 |

① Population of entire city/region. C: city. M: metropolitan, greater region. (E, W): Eurostat, Wikipedia (year).

② For cases where WTP's catchment area is bigger than the actual city (i.e. covering suburbs, see Ruisbroek\_BE) coverages are > 100%. Coverage close to 100% does not imply a perfect alignment between city boundary and WTP catchment area. For cases where coverage is far below 100% is very likely the existence of supplementary WTP in the city that have not participated in the study

**Table S2.** Date of the beginning of the monitoring campaign and sampling mode used to collect wastewater samples.

| City           | Country | Monitoring Date ①/Sampling Mode ② |      |      |      |      |      |      |      |      |      |      |      |      |   |
|----------------|---------|-----------------------------------|------|------|------|------|------|------|------|------|------|------|------|------|---|
|                |         | 2011                              | 2012 | 2013 | 2014 | 2015 | 2016 | 2017 |      |      |      |      |      |      |   |
| Innsbruck      | AT      |                                   |      |      |      |      |      |      |      | 29.3 | u    | 4.4  | u    |      |   |
| Klosterneuburg | AT      |                                   |      |      |      |      |      | 10.6 | u    |      |      |      |      |      |   |
| Adelaide BA    | AU      |                                   |      |      |      |      |      |      |      |      |      | 2.4  | nr   |      |   |
| Adelaide BH    | AU      |                                   |      |      |      |      |      |      |      |      |      | 2.4  | nr   |      |   |
| Adelaide G     | AU      |                                   |      |      |      |      |      |      |      |      |      | 2.4  | nr   |      |   |
| Adelaide CB    | AU      |                                   |      |      |      |      |      |      |      |      |      | 2.4  | nr   |      |   |
| Canberra       | AU      |                                   |      |      | 12.3 | nr   | 18.3 | nr   |      |      |      | 5.8  | nr   |      |   |
| Toowoomba      | AU      |                                   |      |      | 12.3 | u    | 17.3 | u    |      |      |      | 4.8  | u    |      |   |
| Sarajevo       | BA      |                                   |      | 6.3  | t    |      |      |      |      | 25.5 | t    |      |      |      |   |
| Antwerp D      | BE      |                                   | 17.4 | t    | 6.3  | t    | 4.4  | t    | 18.3 | t    | 28.9 | t    |      |      |   |
| Antwerp Z      | BE      | 9.3                               | t    | 17.4 | t    | 6.3  | t    | 3.4  | t    | 18.3 | t    | 28.9 | t    | 19.4 | t |
| Boom           | BE      |                                   |      |      |      |      |      |      |      |      |      |      | 17.5 | t    |   |
| Brussels       | BE      | 9.3                               | u    | 17.4 | u    | 6.3  | u    |      | 18.3 | u    | 28.9 | u    | 20.4 | u    |   |
| Geraardsbergen | BE      |                                   |      |      | 7.3  | t    | 19.3 | t    | 11.3 | t    |      |      |      |      |   |
| Koksijde       | BE      |                                   |      |      | 21.3 | t    |      |      | 11.3 | t    | 19.5 | t    | 19.4 | t    |   |
| Merchtem       | BE      |                                   |      |      |      |      |      |      |      |      |      |      | 16.5 | t    |   |
| Ninove         | BE      |                                   |      |      | 6.3  | t    | 19.3 | t    | 11.3 | t    |      |      |      |      |   |
| Oostende       | BE      |                                   |      |      |      |      |      |      | 11.3 | t    | 19.5 | t    | 19.4 | t    |   |
| Ruisbroek      | BE      |                                   |      |      |      |      |      |      |      |      |      |      | 17.5 | t    |   |
| Sofia          | BG      |                                   |      |      |      |      |      |      |      |      | 24.5 | t    |      |      |   |
| Granby         | CA      |                                   |      |      |      |      | 11.3 | t    | 17.3 | t    |      |      |      |      |   |
| Montreal       | CA      |                                   |      |      |      |      | 11.3 | u    | 17.3 | u    |      |      |      |      |   |

|             |    |     |   |      |   |      |   |      |   |      |   |      |   |      |   |
|-------------|----|-----|---|------|---|------|---|------|---|------|---|------|---|------|---|
| Basel       | CH |     |   | 17.4 | u | 6.3  | u | 18.3 | u | 18.3 | u | 16.3 | u | 22.3 | u |
| Berne       | CH |     |   | 17.4 | u | 6.3  | u | 18.3 | u | 18.3 | u | 16.3 | u | 22.3 | u |
| Biel        | CH |     |   |      |   |      |   | 18.3 | u |      |   |      |   |      |   |
| Chur        | CH |     |   |      |   |      |   | 18.3 | † | 18.3 | † |      |   |      |   |
| Geneva      | CH |     |   | 17.4 | u | 6.3  | u | 18.3 | u | 18.3 | u | 16.3 | u | 22.3 | u |
| Lausanne    | CH |     |   |      |   |      |   | 18.3 | u | 18.3 | u |      |   |      |   |
| Lugano      | CH |     |   |      |   |      |   | 18.3 | † | 25.3 | † | 16.3 | † |      |   |
| Luzern      | CH |     |   |      |   |      |   | 18.3 | u | 18.3 | u |      |   |      |   |
| Neuchatel   | CH |     |   |      |   |      |   | 18.3 | u | 18.3 | u |      |   |      |   |
| Sion        | CH |     |   |      |   |      |   | 18.3 | † | 18.3 | † |      |   |      |   |
| St.Gallen H | CH |     |   | 18.4 | u | 6.3  | u | 18.3 | u | 18.3 | u | 16.3 | u | 22.3 | u |
| St.Gallen A | CH |     |   | 17.4 | u | 6.3  | u |      |   |      |   |      |   |      |   |
| Winterthur  | CH |     |   |      |   |      |   | 18.3 | u | 18.3 | u |      |   |      |   |
| Zurich      | CH |     |   | 17.4 | u | 6.3  | u | 18.3 | u | 18.3 | u | 16.3 | u | 22.3 | u |
| Bogota      | CO |     |   |      |   |      |   |      |   | 10.3 | u |      |   |      |   |
| Medellin    | CO |     |   |      |   |      |   |      |   | 27.6 | † |      |   |      |   |
| Nicosia     | CY |     |   |      |   | 21.3 | u |      |   | 4.4  | u | 16.3 | u | 22.3 | u |
| Limassol    | CY |     |   |      |   | 21.3 | u |      |   | 4.4  | † | 16.3 | † | 22.3 | † |
| Brno        | CZ |     |   |      |   |      |   |      |   |      |   |      |   | 5.4  | u |
| Budweis     | CZ | 9.3 | † | 17.4 | † | 6.3  | † |      |   | 18.3 | † |      |   | 5.4  | † |
| Prague      | CZ |     |   | 17.4 | † | 6.3  | † |      |   |      |   |      |   |      |   |
| Chemnitz    | DE |     |   |      |   |      |   |      |   |      |   |      |   | 13.6 | † |
| Berlin M    | DE |     |   |      |   |      |   | 11.3 | u | 19.3 | u |      |   | 29.3 | u |
| Berlin R    | DE |     |   |      |   |      |   | 11.3 | u | 19.3 | u |      |   | 29.3 | u |
| Berlin S    | DE |     |   |      |   |      |   | 11.3 | u | 19.3 | u |      |   | 29.3 | u |
| Berlin W    | DE |     |   |      |   |      |   | 11.3 | u | 19.3 | u |      |   | 29.3 | u |

|                  |    |      |   |      |   |      |   |      |   |      |   |      |   |      |    |
|------------------|----|------|---|------|---|------|---|------|---|------|---|------|---|------|----|
| Dortmund         | DE |      |   |      |   | 13.3 | u | 12.3 | u | 18.3 | u | 5.4  | u | 5.4  | u  |
| Dülmen           | DE |      |   |      |   | 6.3  | t | 12.3 | t | 18.3 | t | 5.4  | t | 5.4  | t  |
| Dresden          | DE |      |   |      |   | 6.3  | u | 11.3 | u | 18.3 | u | 5.4  | u | 5.4  | u  |
| Erfurt           | DE |      |   |      |   |      |   |      |   |      |   |      |   | 5.4  | nr |
| Munich G         | DE |      |   |      |   |      |   | 12.3 | t | 20.3 | t | 5.4  | t | 5.4  | t  |
| Munich M         | DE |      |   |      |   |      |   |      |   |      |   | 5.4  | t | 5.4  | t  |
| Nuremberg        | DE |      |   |      |   |      |   |      |   |      |   |      |   | 5.4  | nr |
| Hamburg N        | DE |      |   |      |   |      |   |      |   |      |   |      |   | 5.4  | t  |
| Hamburg S        | DE |      |   |      |   |      |   |      |   |      |   |      |   | 5.4  | t  |
| Hannover H       | DE |      |   |      |   |      |   |      |   |      |   |      |   | 13.6 | t  |
| Hannover G       | DE |      |   |      |   |      |   |      |   |      |   |      |   | 13.6 | t  |
| Frankfurt N      | DE |      |   |      |   |      |   |      |   |      |   |      |   | 5.4  | t  |
| Frankfurt G      | DE |      |   |      |   |      |   |      |   |      |   |      |   | 5.4  | t  |
| Frankfurt S      | DE |      |   |      |   |      |   |      |   |      |   |      |   | 5.4  | t  |
| Magdeburg        | DE |      |   |      |   |      |   |      |   |      |   |      |   | 5.4  | t  |
| Mainz            | DE |      |   |      |   |      |   |      |   |      |   |      |   | 13.6 | t  |
| Rostock          | DE |      |   |      |   |      |   |      |   |      |   |      |   | 13.6 | nr |
| Saarbrücken Br   | DE |      |   |      |   |      |   |      |   |      |   |      |   | 13.6 | nr |
| Saarbrücken Bu   | DE |      |   |      |   |      |   |      |   |      |   |      |   | 13.6 | nr |
| Stuttgart        | DE |      |   |      |   |      |   |      |   |      |   |      |   | 5.4  | nr |
| Copenhagen       | DK |      |   |      |   | 6.3  | u | 11.3 | u | 10.3 | u |      |   |      |    |
| Barcelona        | ES | 16.3 | t | 17.4 | t | 6.3  | t | 18.3 | t | 11.3 | t | 9.3  | t | 9.3  | t  |
| Castellon        | ES | 9.3  | t | 17.4 | t | 6.3  | t | 11.3 | t | 25.3 | t | 8.3  | t | 6.4  | t  |
| Molina de Segura | ES |      |   |      |   |      |   |      |   | 15.4 | t | 6.4  | t |      |    |
| Santiago         | ES | 9.3  | t | 17.4 | t | 6.3  | t | 11.3 | t | 4.3  | t | 19.4 | t | 27.3 | t  |
| Valencia P1      | ES |      |   |      |   | 6.3  | t | 11.3 | t | 4.3  | t | 2.3  | t | 2.5  | t  |

|                  |    |     |   |      |   |     |   |      |   |      |   |      |   |      |   |
|------------------|----|-----|---|------|---|-----|---|------|---|------|---|------|---|------|---|
| Valencia P2      | ES |     |   |      |   | 6.3 | † | 11.3 | † | 4.3  | † | 2.3  | † | 2.5  | † |
| Valencia QB      | ES |     |   |      |   | 6.3 | † | 11.3 | † | 4.3  | † | 2.3  | † | 2.5  | † |
| Espoo            | FI |     |   |      |   |     |   | 11.3 | υ | 11.3 | υ | 16.3 | υ | 22.3 | υ |
| Helsinki         | FI | 9.3 | υ | 17.4 | υ | 6.3 | υ | 11.3 | υ | 11.3 | υ | 16.3 | υ | 22.3 | υ |
| Joensuu          | FI |     |   |      |   |     |   | 18.3 | † |      |   | 16.3 | † |      |   |
| Jyväskylä        | FI |     |   |      |   |     |   | 11.3 | υ |      |   | 16.3 | υ |      |   |
| Kotka            | FI |     |   |      |   |     |   | 11.3 | υ |      |   | 16.3 | υ |      |   |
| Kuopio           | FI |     |   |      |   |     |   | 11.3 | υ |      |   | 16.3 | υ |      |   |
| Lahti            | FI |     |   |      |   |     |   | 25.3 | υ |      |   | 16.3 | υ |      |   |
| Lappeenranta     | FI |     |   |      |   |     |   | 11.3 | † |      |   | 16.3 | † |      |   |
| Oulu             | FI |     |   |      |   |     |   | 11.3 | † |      |   | 16.3 | † |      |   |
| Rovaniemi        | FI |     |   |      |   |     |   | 11.3 | † |      |   | 16.3 | † |      |   |
| Savonlinna       | FI |     |   |      |   |     |   | 11.3 | † |      |   | 16.3 | † |      |   |
| Tampere          | FI |     |   |      |   |     |   | 11.3 | υ | 11.3 | υ | 16.3 | υ | 22.3 | υ |
| Turku            | FI | 9.3 | υ | 17.4 | υ | 6.3 | υ | 11.3 | υ | 11.3 | υ | 16.3 | υ | 22.3 | υ |
| Vaasa            | FI |     |   |      |   |     |   | 11.3 | υ |      |   | 16.3 | υ |      |   |
| Bordeaur 1       | FR |     |   |      |   |     |   |      |   |      |   | 26.9 | υ | 15.6 | υ |
| Bordeaur 2       | FR |     |   |      |   |     |   |      |   |      |   |      |   | 15.6 | υ |
| Fort-de-France D | FR |     |   |      |   |     |   | 27.3 | † |      |   |      |   |      |   |
| Fort-de-France P | FR |     |   |      |   |     |   | 27.3 | † | 28.5 | † |      |   | 1.7  | † |
| Paris G          | FR |     |   | 21.4 | υ |     |   |      |   |      |   |      |   |      |   |
| Paris SC         | FR | 9.3 | υ |      |   | 6.3 | υ | 11.3 | υ | 23.3 | υ | 31.3 | υ | 29.4 | υ |
| Paris SE         | FR |     |   |      |   |     |   |      |   |      |   |      |   | 19.4 | † |
| Bristol          | GB |     |   |      |   |     |   | 11.3 | † | 10.3 | † | 7.3  | † | 22.3 | † |
| London           | GB | 9.3 | † |      |   | 6.3 | † | 11.3 | † | 11.3 | † | 7.3  | † |      |   |
| Athens           | GR |     |   |      |   | 6.3 | † | 11.3 | † | 4.3  | † | 16.3 | † | 3.8  | † |

|              |    |      |   |      |   |     |      |      |      |      |      |      |      |      |    |
|--------------|----|------|---|------|---|-----|------|------|------|------|------|------|------|------|----|
| Mytilene     | GR |      |   |      |   |     |      |      | 11.2 | nr   |      |      |      |      |    |
| Thessaloniki | GR |      |   |      |   |     | 11.3 | nr   | 28.5 | nr   |      |      |      |      |    |
| Zagreb       | HR | 9.3  | t | 17.4 | t | 6.3 | t    | 11.3 | t    | 17.3 | t    | 9.3  | t    | 21.3 | t  |
| Reykjavik N  | IS |      |   |      |   |     |      |      | 27.6 | t    | 16.3 | t    | 22.3 | t    |    |
| Reykjavik S  | IS |      |   |      |   |     |      |      |      |      | 16.3 | t    | 22.3 | t    |    |
| Tel-Aviv     | IL |      |   |      |   |     |      |      |      |      | 24.3 | t    |      |      |    |
| Milan        | IT | 9.3  | u | 17.4 | u | 6.3 | u    | 11.3 | u    | 10.3 | u    | 16.3 | u    | 28.3 | u  |
| Bari         | IT |      |   |      |   |     |      |      |      |      |      |      | 15.5 | t    |    |
| Bologna      | IT |      |   |      |   |     |      |      |      |      |      |      | 8.5  | u    |    |
| Gorizia      | IT |      |   |      |   |     |      |      |      |      |      |      | 8.5  | t    |    |
| Potenza      | IT |      |   |      |   |     |      |      |      |      |      |      | 15.5 | t    |    |
| Palermo      | IT |      |   |      |   |     |      |      |      |      |      |      | 15.5 | t    |    |
| Busan        | KR |      |   |      |   |     |      |      | 18.3 | t    |      |      |      |      |    |
| Bendern      | LI |      |   |      |   |     | 18.3 | t    | 18.3 | t    |      |      |      |      |    |
| Vilnius      | LT |      |   |      |   |     |      |      |      |      |      |      | 22.3 | t    |    |
| Malta        | MT |      |   |      |   |     |      |      | 18.3 | nr   |      |      |      |      |    |
| Amsterdam    | NL | 9.3  | u | 17.4 | u | 6.3 | u    | 13.3 | u    | 4.3  | u    |      |      | 19.4 | u  |
| Eindhoven    | NL | 9.3  | u | 17.4 | u | 6.3 | u    | 11.3 | u    | 4.3  | u    | 9.3  | u    | 19.4 | u  |
| Utrecht      | NL | 10.3 | u | 17.4 | u | 6.3 | u    | 11.3 | u    | 4.3  | u    | 9.3  | u    | 19.4 | u  |
| Nieuwegein   |    |      |   |      |   |     |      |      |      |      |      |      |      |      |    |
| Ijssel.      | NL |      |   |      |   |     |      |      |      |      |      |      |      | 19.4 | nr |
| Oudewater    | NL |      |   |      |   |     |      |      |      |      |      |      |      | 19.4 | nr |
| Auckland M   | NZ |      |   |      |   |     |      |      | 4.3  | t    |      |      |      |      |    |
| Auckland R   | NZ |      |   |      |   |     |      |      | 4.3  | u    |      |      |      |      |    |
| Oslo         | NO | 9.3  | u | 17.4 | u | 6.3 | u    | 11.3 | u    | 11.3 | u    | 11.3 | u    | 26.5 | u  |
| Krakow K     | PL |      |   |      |   |     |      |      |      |      |      | 3.4  | t    | 12.2 | t  |
| Krakow P     | PL |      |   |      |   |     |      |      |      |      |      | 3.4  | t    | 12.2 | t  |

|              |    |     |    |      |      |     |      |      |      |      |      |      |      |    |
|--------------|----|-----|----|------|------|-----|------|------|------|------|------|------|------|----|
| Almada       | PT |     |    |      |      |     | 11.3 | t    | 24.3 | t    | 12.4 | t    | 22.3 | t  |
| Lisbon       | PT |     |    |      | 6.3  | t   |      |      | 26.3 | t    | 12.4 | t    | 22.3 | t  |
| Porto        | PT |     |    |      |      |     |      |      | 23.4 | nr   | 20.4 | nr   | 3.5  | nr |
| Alba Iulia   | RO |     |    |      |      |     |      |      |      |      | 25.5 | nr   |      |    |
| Cluj Napoca  | RO |     |    |      | 6.3  | nr  |      |      |      |      | 24.5 | nr   |      |    |
| Beograd      | RS |     |    |      | 17.3 | t   |      |      |      |      | 25.5 | nr   |      |    |
| Novi Sad     | RS |     |    |      | 6.3  | t   |      |      |      |      |      |      |      |    |
| Gothenburg   | SE |     |    | 17.4 | t    | 6.3 | t    |      |      |      |      |      |      |    |
| Stockholm H  | SE | 9.3 | nr |      |      |     |      |      |      |      | 11.5 | nr   |      |    |
| Stockholm S  | SE |     |    |      |      |     |      |      |      |      | 11.5 | nr   |      |    |
| Umeå         | SE | 9.3 | u  | 17.4 | u    | 6.3 | u    |      |      |      |      |      |      |    |
| Ljubljana    | SI |     |    |      |      |     |      |      |      |      |      |      | 21.3 | t  |
| Bratislava C | SK |     |    |      | 6.3  | t   |      | 11.3 | t    | 9.3  | t    | 24.3 | t    |    |
| Bratislava P | SK |     |    |      | 6.3  | t   |      | 17.3 | t    | 9.3  | t    | 24.3 | t    |    |
| Piestany     | SK |     |    |      | 6.3  | t   |      | 11.3 | t    | 9.3  | t    | 21.3 | t    |    |
| Uzhhorod     | UA |     |    |      |      |     |      |      |      | 26.5 | nr   |      |      |    |
| Seattle      | US |     |    |      |      |     |      | 24.3 | nr   | 14.6 | nr   | 15.6 | nr   |    |

① Monitoring day: first day of the monitoring week (day.month)

② Sampling mode: t time proportional, u volume proportional, † flow proportional, nr: not reported



**Table S3.** Biomarkers used, excretion rates, correction factors and standardized average doses used for back-calculation of consumption of cocaine, amphetamine, methamphetamine and MDMA combined.

| Compound        | Drug Residue    | Excretion rate (%) | Correction Factor | Average dose (mg) |
|-----------------|-----------------|--------------------|-------------------|-------------------|
| Cocaine         | benzoylecgonine | 29                 | 3.59 <sup>1</sup> | 100 <sup>3</sup>  |
| Amphetamine     | amphetamine     | 36                 | 2.77 <sup>2</sup> | 50 <sup>4</sup>   |
| Methamphetamine | methamphetamine | 41                 | 2.44 <sup>2</sup> | 50 <sup>4</sup>   |
| MDMA            | MDMA            | 22.5               | 4.4 <sup>2</sup>  | 100 <sup>3</sup>  |

<sup>1</sup> Castiglioni S, Bijlsma L, Covaci A, Emke E, Hernández F, Reid M et al., Zuccato E. Evaluation of Uncertainties Associated with the Determination of Community Drug Use through the Measurement of Sewage Drug Biomarkers. *Environmental Science & Technology*. 2013;47:1452-60

<sup>2</sup> Gracia-Lor E, Zuccato E, Castiglioni S. Refining correction factors for back-calculation of illicit drug use. *Science of the Total Environment*. 2016;573:1648-59

<sup>3</sup> Zuccato E, Chiabrando C, Castiglioni S, Bagnati R, Fanelli R. Estimating community drug abuse by wastewater analysis. *Environmental Health Perspectives*. 2008;116:1027-32

<sup>4</sup> <http://www.emcdda.europa.eu/drug-profiles>, archived at <http://www.webcitation.org/73dJQ1ua> on 2/11/2018

## Uncertainties related to WBE

Uncertainties related to the mass of drug residues that enter the sewer system through toilet flushes are listed in the left column of Table S3. Uncertainties originating from sampling and chemical analysis can be quantified and minimized (\*). For flow measurements plausibility checks are performed to exclude gross errors (+). For these aspects, all partners stick to the best practice protocol developed by SCORE<sup>1</sup>. Other aspects such as losses from sewers, in-sewer transformation and population size cannot be addressed in-depth in such large-scale screening studies (°). In addition, the uncertainties in the right column of Table S3 affect the comparison of absolute numbers of doses consumed. These aspects are relevant when comparing WBE to consumption estimates obtained with other methods (global population survey) and, in the context of this study, only for the presentation of “combined doses”.

**Table S4.** List of uncertainties and their characterization into *random* or *systematic*.

| Uncertainties relevant for estimation of population-normalized ... |       |                              |        |
|--------------------------------------------------------------------|-------|------------------------------|--------|
| ... drug residue mass in sewers                                    | refs  | ... number of doses consumed | refs   |
| <b>losses from sewers (exfiltration)°</b>                          | 2     | <b>excretion rates</b>       | 13, 17 |
| <b>in-sewer transformation°</b>                                    | 3-9   | <b>standard doses</b>        | -      |
| <b>sample collection*</b>                                          | 10    | <b>purity</b>                | -      |
| <b>flow measurements<sup>+</sup></b>                               | 2     |                              |        |
| <i>chemical analyses*</i>                                          | 11    |                              |        |
| <b>Population size°</b>                                            | 12-15 |                              |        |
| annual average                                                     | 16    |                              |        |
| drug residues not discharged to sewers                             | -     |                              |        |

<sup>1</sup> European Monitoring Centre for Drugs and Drug Addiction, “Common protocol of action for monitoring illicit drugs in wastewater”, available at: <https://goo.gl/seR7Ke>

<sup>2</sup> Ort C, van Nuijs ALN, Berset JD, Bijlsma L, Castiglioni S, Covaci A, et al., Thomas KV. Spatial differences and temporal changes in illicit drug use in Europe quantified by wastewater analysis. *Addiction*. 2014;108(9):1338-52

<sup>3</sup> Li J, Gao J, Thai PK, Sun X, Mueller JF, Yuan Z, Jiang G. Stability of Illicit Drugs as Biomarkers in Sewers: From Lab to Reality. *Environmental Science & Technology*. 2018;52(3):1561-70

<sup>4</sup> McCall AK, Palmitessa R, Blumensaat F, Morgenroth E, Ort C. Modeling in-sewer transformations at catchment scale – implications on drug consumption estimates in wastewater-based epidemiology. *Water Research*. 2017;122:655–68

<sup>5</sup> McCall AK, Scheidegger A, Madry MM, Steuer AE, Weissbrodt DG, Vanrolleghem PA, et al., Ort, C. Influence of different sewer biofilms on transformation rates of drugs. *Environmental Science & Technology*. 2016;50:13351–60

<sup>6</sup> Ramin P, Brock AL, Polesel F, Causanilles A, Emke E, de Voogt P, Plósz BG. Transformation and sorption of illicit drug biomarkers in sewer systems: understanding the role of suspended solids in raw wastewater. *Environmental Science & Technology*. 2016;50:13397–408

- <sup>7</sup> Ramin P, Polesel F, Brock AL, Plósz BG. The impact of temperature on the transformation of illicit drug biomarkers in wastewater. *Science of the Total Environment*. 2018;644:1612–16
- <sup>8</sup> Senta I, Krizman I, Ahel M, Terzic S. Assessment of stability of drug biomarkers in municipal wastewater as a factor influencing the estimation of drug consumption using sewage epidemiology. *Science of the Total Environment*. 2014;487:659–65
- <sup>9</sup> Thai PK, Jiang G, Gernjak W, Yuan Z, Lai FY, Mueller JF. Effects of sewer conditions on the degradation of selected illicit drug residues in wastewater. *Water Research*. 2014;48:538–47
- <sup>10</sup> Ort C, Lawrence MG, Rieckermann J, Joss A. Monitoring Pharmaceuticals and Personal Care Products (PPCPs) and Illicit Drugs in Wastewater Systems: Are Your Conclusions Valid? A Critical Review. *Environmental Science & Technology*. 2010;44(16):6024–35
- <sup>11</sup> van Nuijs ALN, Been F, Lai FY, Andres-Costa MJ, Barron L, Baz-Lomba JA, et al., Ort C. Multi-year interlaboratory exercises for the analysis of illicit drugs and metabolites in wastewater: development of a quality control system. *Trends in Analytical Chemistry*. 2018;103:34–43
- <sup>12</sup> O'Brien JW, Thai P, Ort C, Scheidegger A, Eaglesham G, Carter S, Lai FY, Mueller JF. A model to estimate the population contributing to the wastewater using samples collected on census day. *Environmental Science & Technology*. 2014;48(1):517–25
- <sup>13</sup> Castiglioni S, Bijlsma L, Covaci A, Emke E, Hernández F, Reid M, et al., Zuccato E. Evaluation of uncertainties associated with the determination of community drug consumption through the measurement of sewage biomarkers. *Environmental Science & Technology*. 2013;47(3):1452–60
- <sup>14</sup> O'Brien JW, Banks APW, Novic AJ, Mueller JF, Jiang G, Ort C, et al., Thai P.K. Impact of in-Sewer Degradation of Pharmaceutical and Personal Care Products (PPCPs) Population Markers on a Population Model. *Environmental Science & Technology*. 2017;51(7):3816–23
- <sup>15</sup> Lai FY, Anuj S, Bruno R, Carter S, Gartner C, Hall W, et al., Ort C. Systematic and day-to-day effects of chemical-derived population estimates on wastewater-based drug epidemiology. *Environmental Science & Technology*. 2015;49:999–1008
- <sup>16</sup> Ort C, Eppler JM, Scheidegger A, Rieckermann J, Kinzig M, Sörgel F. Challenges of surveying wastewater drug loads in small populations and generalizable aspects on optimizing monitoring design. *Addiction*. 2014;109(3):472–81
- <sup>17</sup> Gracia-Lor E, Zuccato E, Castiglioni S. Refining correction factors for back-calculation of illicit drug use. *Science of the Total Environment*. 2016;573:1648–59

## ***Cannabis (THC-COOH): results and discussion***

Population-normalized mass loads of THC-COOH are only available for a limited number of locations (see Appendix S3, cities with either a value or <LOQ). The highest loads were observed in Amsterdam, Barcelona and Paris SC and, among the locations sampled outside Europe, in Seattle and Fort-de-France (Appendix S3). Furthermore, the high loads observed in Novi Sad are noteworthy, yet the sampling and analysis in this location was performed only on one occasion (i.e. 2013) and, therefore, results have to be interpreted with caution. Interestingly, intra-country differences were observed for those countries where multiple cities were sampled and analysed: in general, larger cities showed higher loads of THC-COOH.

In terms of temporal variations, most locations showed a rather stable cannabis use across years. However, some cities showed a clear increasing or decreasing trend. In Barcelona and Zagreb, mass loads rose significantly between 2011 and 2017 with a factor of 3.5 to 4. Two out of the three studied catchments in Paris (G and SE) showed high population-normalized loads of THC-COOH during the only year they participated in the study. However, the trends in Paris SC, which was monitored 5 years, showed a 40% decrease between 2011 and 2017.

In contrast to cocaine and amphetamine-type stimulants, the use of cannabis, calculated from measurements of THC-COOH, does not show any clear geographical pattern in Europe and only some geographical trends are in agreement with numbers obtained from prevalence and production indicators. As an example, the highest THC-COOH loads were found in cities from NL, a country with a liberal drug policy on soft drugs<sup>1</sup>, and from ES, the major point of entry of cannabis resin produced in Morocco<sup>2</sup>. On a temporal analysis, the stable loads found in most of the locations sampled 5 years or more agree with the most recent surveys on cannabis use, which also point to a stable consumption of this drug in most countries<sup>2</sup>.

---

<sup>1</sup> Bijlsma L., Emke E., Hernández F., de Voogt P. Investigation of drugs of abuse and relevant metabolites in Dutch sewage water by liquid chromatography coupled to high resolution mass spectrometry. *Chemosphere* 2012;89: 1399–406

<sup>2</sup> European Monitoring Centre for Drugs and Drug Addiction 2017. *European Drug Report 2017: Trends and Developments*, Publications Office of the European Union, Luxembourg.
